# Supplementary material
Source: HighWire-hosted journal article supplement (https://bmjopen.bmj.com/content/9/7/e026634)
Supplement: inline-supplementary-material-1 [file inline-supplementary-material-1.pdf]

## Supplementary

**Table 1 The prevalence and standardize prevalence of short stature in provinces**

| Province       | China reference |                                | WHO reference |                                       |
|----------------|-----------------|--------------------------------|---------------|---------------------------------------|
|                | N (%)           | Age-standardized prevalence, % | N (%)         | Age-gender standardized prevalence, % |
| Beijing        | 41 (0.62)       | 0.64                           | 22 (0.33)     | 0.31                                  |
| Tianjin        | 54 (0.75)       | 0.77                           | 38 (0.53)     | 0.52                                  |
| Hebei          | 93 (1.29)       | 1.30                           | 77 (1.07)     | 1.05                                  |
| Shanxi         | 222 (3.08)      | 3.14                           | 152 (2.11)    | 2.12                                  |
| Inner Mongolia | 134 (1.90)      | 1.91                           | 94 (1.33)     | 1.31                                  |
| Liaoning       | 79 (1.10)       | 1.10                           | 60 (0.83)     | 0.83                                  |
| Jilin          | 129 (1.81)      | 1.82                           | 91 (1.28)     | 1.29                                  |
| Heilongjiang   | 205 (2.86)      | 2.80                           | 134 (1.87)    | 1.81                                  |
| Shanghai       | 60 (0.84)       | 0.82                           | 43 (0.60)     | 0.60                                  |
| Jiangsu        | 50 (0.72)       | 0.74                           | 38 (0.55)     | 0.57                                  |
| Zhejiang       | 93 (1.30)       | 1.30                           | 83 (1.16)     | 1.14                                  |
| Anhui          | 151 (2.10)      | 2.10                           | 121 (1.68)    | 1.67                                  |
| Fujian         | 81 (1.13)       | 1.14                           | 57 (0.79)     | 0.79                                  |
| Jiangxi        | 287 (4.00)      | 4.06                           | 214 (2.98)    | 2.97                                  |
| Shandong       | 30 (0.42)       | 0.42                           | 31 (0.43)     | 0.43                                  |
| Henan          | 127 (1.76)      | 1.79                           | 93 (1.29)     | 1.28                                  |
| Hubei          | 178 (2.53)      | 2.59                           | 120 (1.70)    | 1.75                                  |
| Hunan          | 345 (4.80)      | 4.82                           | 281 (3.91)    | 3.83                                  |
| Guangdong      | 355 (4.93)      | 4.95                           | 276 (3.83)    | 3.78                                  |
| Guangxi        | 472 (6.84)      | 6.86                           | 380 (5.51)    | 5.43                                  |
| Hainan         | 539 (7.49)      | 7.40                           | 403 (5.60)    | 5.45                                  |
| Chongqing      | 522 (7.25)      | 7.37                           | 407 (5.65)    | 5.61                                  |
| Sichuan        | 620 (8.61)      | 8.66                           | 477 (6.63)    | 6.52                                  |
| Guizhou        | 972 (13.51)     | 13.61                          | 725 (10.07)   | 10.04                                 |
| Yunnan         | 337 (4.68)      | 4.64                           | 247 (3.43)    | 3.38                                  |
| Shaanxi        | 454 (6.32)      | 6.46                           | 320 (4.46)    | 4.45                                  |
| Gansu          | 244 (3.39)      | 3.49                           | 167 (2.32)    | 2.34                                  |
| Qinghai        | 446 (6.20)      | 6.31                           | 275 (3.82)    | 3.83                                  |
| Ningxia        | 235 (3.42)      | 3.45                           | 158 (2.30)    | 2.30                                  |
| Xinjiang       | 292 (4.11)      | 4.09                           | 196 (2.76)    | 2.69                                  |

**Table 2 The results of Anselin Local Moran's I**

| Province       | China reference |         |             | WHO reference |         |             |
|----------------|-----------------|---------|-------------|---------------|---------|-------------|
|                | Z Score         | P Value | Type        | Z Score       | P Value | Type        |
| Zhejiang       | 1.99            | 0.008   | LL          | 1.82          | 0.024   | LL          |
| Yunnan         | 4.23            | 0.002   | HH          | 4.31          | 0.002   | HH          |
|                |                 |         | Not         |               |         | Not         |
| Xinjiang       | 0.87            | 0.258   | Significant | 0.60          | 0.214   | Significant |
| Sichuan        | 3.48            | 0.002   | HH          | 3.71          | 0.002   | HH          |
|                |                 |         | Not         |               |         | Not         |
| Shaanxi        | -0.08           | 0.492   | Significant | -0.09         | 0.47    | Significant |
| Shanxi         | 2.37            | 0.008   | LL          | 2.38          | 0.004   | LL          |
| Shandong       | 3.52            | 0.002   | LL          | 3.36          | 0.002   | LL          |
|                |                 |         | Not         |               |         | Not         |
| Qinghai        | 0.74            | 0.214   | Significant | 0.64          | 0.24    | Significant |
|                |                 |         | Not         |               |         | Not         |
| Ningxia        | -0.20           | 0.396   | Significant | 0.01          | 0.458   | Significant |
| Inner Mongolia | 2.17            | 0.008   | LL          | 2.18          | 0.004   | LL          |
| Liaoning       | 2.75            | 0.002   | LL          | 2.67          | 0.002   | LL          |
|                |                 |         | Not         |               |         | Not         |
| Jiangxi        | -0.11           | 0.466   | Significant | 0.09          | 0.444   | Significant |
| Jilin          | 2.03            | 0.006   | LL          | 1.97          | 0.006   | LL          |
| Hunan          | 2.05            | 0.02    | HH          | 2.47          | 0.014   | HH          |
|                |                 |         | Not         |               |         | Not         |
| Hubei          | -0.39           | 0.348   | Significant | -0.62         | 0.288   | Significant |
|                |                 |         | Not         |               |         | Not         |
| Heilongjiang   | 0.98            | 0.198   | Significant | 0.99          | 0.15    | Significant |
|                |                 |         | Not         |               |         | Not         |
| Henan          | 1.12            | 0.138   | Significant | 1.07          | 0.15    | Significant |
| Beijing        | 2.04            | 0.002   | LL          | 1.90          | 0.002   | LL          |
| Tianjin        | 2.27            | 0.002   | LL          | 2.32          | 0.002   | LL          |
| Hainan         | 2.69            | 0.014   | HH          | 3.02          | 0.01    | HH          |
| Guizhou        | 3.65            | 0.002   | HH          | 3.91          | 0.002   | HH          |
| Guangxi        | 3.62            | 0.002   | HH          | 4.12          | 0.002   | HH          |
|                |                 |         | Not         |               |         | Not         |
| Gansu          | -1.65           | 0.066   | Significant | -1.54         | 0.088   | Significant |
|                |                 |         | Not         |               |         | Not         |
| Fujian         | 0.08            | 0.494   | Significant | -0.18         | 0.406   | Significant |

|           |      |       |    |      |       |    |
|-----------|------|-------|----|------|-------|----|
| Anhui     | 2.43 | 0.002 | LL | 2.39 | 0.008 | LL |
| Shanghai  | 2.52 | 0.002 | LL | 2.39 | 0.002 | LL |
| Chongqing | 3.23 | 0.002 | HH | 3.45 | 0.002 | HH |
| Jiangsu   | 2.97 | 0.002 | LL | 2.82 | 0.002 | LL |
| Guangdong | 1.86 | 0.036 | HH | 2.19 | 0.026 | HH |
| Hebei     | 2.10 | 0.002 | LL | 2.14 | 0.002 | LL |

Abbreviations: HH: High-High cluster; LL: Low-Low cluster.

**Table 3 The results of Hotspot Getis-Ord, Gi\***

| Province       | China reference |         |        | WHO reference |         |        |
|----------------|-----------------|---------|--------|---------------|---------|--------|
|                | Z Score         | P Value | Gi-Bin | Z Score       | P Value | Gi-Bin |
| Zhejiang       | -1.98           | 0.048   | -2     | -1.79         | 0.074   | -1     |
| Yunnan         | 3.94            | 0.000   | 3      | 4.16          | 0.000   | 3      |
| Xinjiang       | 0.73            | 0.462   | 0      | 0.39          | 0.698   | 0      |
| Sichuan        | 3.19            | 0.001   | 3      | 3.12          | 0.002   | 3      |
| Shaanxi        | 0.12            | 0.905   | 0      | 0.17          | 0.866   | 0      |
| Shanxi         | -2.53           | 0.011   | -2     | -2.55         | 0.011   | -2     |
| Shandong       | -3.45           | 0.001   | -3     | -3.42         | 0.001   | -3     |
| Qinghai        | 1.23            | 0.219   | 0      | 0.95          | 0.342   | 0      |
| Ningxia        | -0.40           | 0.687   | 0      | -0.58         | 0.561   | 0      |
| Inner Mongolia | -2.04           | 0.042   | -2     | -2.09         | 0.037   | -2     |
| Liaoning       | -2.85           | 0.004   | -3     | -2.85         | 0.004   | -3     |
| Jiangxi        | 0.91            | 0.364   | 0      | 1.16          | 0.248   | 0      |
| Jilin          | -2.56           | 0.010   | -2     | -2.55         | 0.011   | -2     |
| Hunan          | 2.04            | 0.042   | 2      | 2.28          | 0.022   | 2      |
| Hubei          | -0.05           | 0.957   | 0      | 0.19          | 0.846   | 0      |
| Heilongjiang   | -1.07           | 0.283   | 0      | -1.11         | 0.267   | 0      |
| Henan          | -0.61           | 0.542   | 0      | -0.47         | 0.638   | 0      |
| Beijing        | -3.17           | 0.002   | -3     | -3.19         | 0.001   | -3     |
| Tianjin        | -3.17           | 0.002   | -3     | -3.19         | 0.001   | -3     |
| Hainan         | 2.94            | 0.003   | 3      | 3.12          | 0.002   | 3      |
| Guizhou        | 3.23            | 0.001   | 3      | 3.38          | 0.001   | 3      |
| Guangxi        | 3.21            | 0.001   | 3      | 3.41          | 0.001   | 3      |
| Gansu          | 1.87            | 0.061   | 1      | 1.64          | 0.102   | 0      |
| Fujian         | 0.52            | 0.602   | 0      | 0.78          | 0.435   | 0      |
| Anhui          | -2.23           | 0.026   | -2     | -2.06         | 0.039   | -2     |
| Shanghai       | -3.15           | 0.002   | -3     | -3.00         | 0.003   | -3     |
| Chongqing      | 2.45            | 0.014   | 2      | 2.54          | 0.011   | 2      |
| Jiangsu        | -3.12           | 0.002   | -3     | -3.01         | 0.003   | -3     |
| Guangdong      | 1.97            | 0.049   | 2      | 2.21          | 0.027   | 2      |
| Hebei          | -3.17           | 0.002   | -3     | -3.19         | 0.001   | -3     |

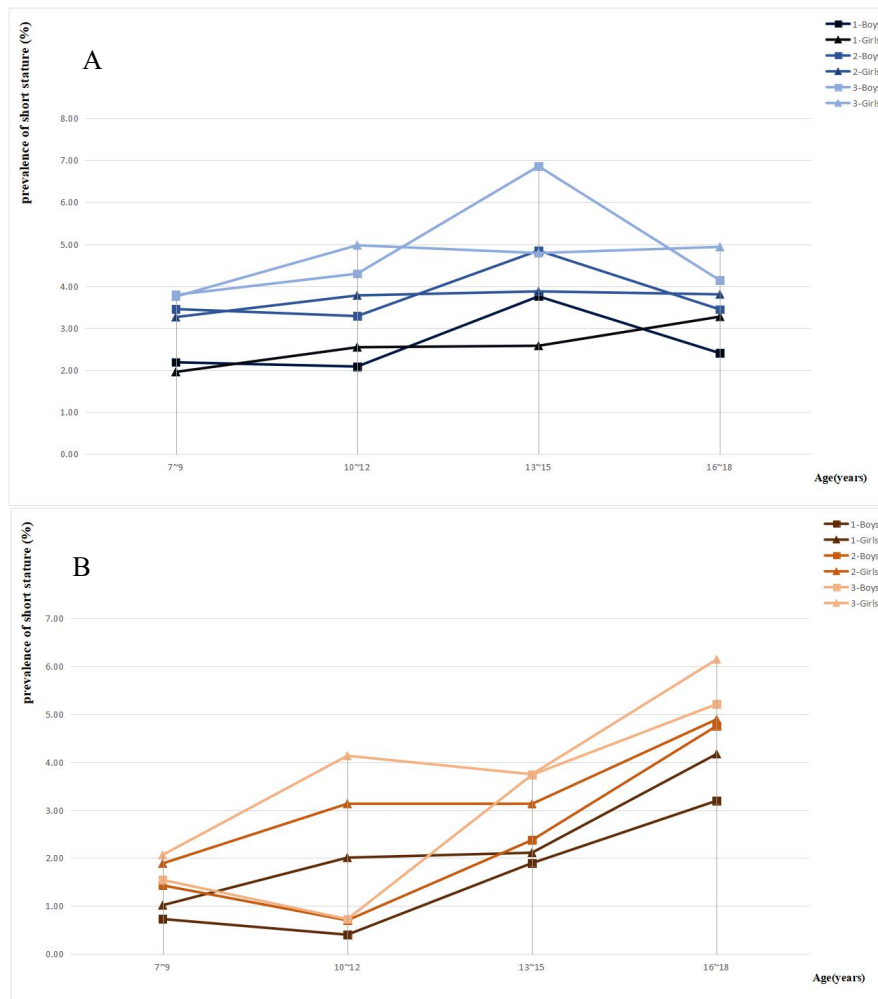

**Figure 1** The discrepancy of prevalence between different age groups in different regions. 1 represents developed region; 2 represents Intermediately developed region; 3 represents under-developed region. A is according Chinese growth reference; B is according WHO growth reference.
